# Supplementary material for: Effects of an Optimized Aged Garlic Extract on Cardiovascular Disease Risk Factors in Moderate Hypercholesterolemic Subjects: A Randomized, Crossover, Double-Blind, Sustainedand Controlled Study
Source: MDPI journal article supplement (doi:10.3390/nu14030405), 2022-01-18
Supplement: s1 [file s1]

**Supplementary Table S1. Changes in homeostasis glucose parameters after 6 weeks of intervention.**

| Variable              | Intervention |                          |             |                          | Change inter-treatments   |         |
|-----------------------|--------------|--------------------------|-------------|--------------------------|---------------------------|---------|
|                       | AGB          |                          | Placebo     |                          | AGB <i>versus</i> Placebo |         |
|                       | Baseline     | Change                   | Baseline    | Change                   | Mean (95%CI)              | P-value |
| Glucose, <i>mg/dL</i> | 94 ± 9.1     | 0.869<br>(-0.49; 2.2)    | 94 ± 10.0   | 0.849<br>(-1.0; 2.7)     | -0.05<br>(-2.3;2.3)       | 0.997   |
| Insulin, $\mu U/mL$   | 0.72 ± 0.24  | -0.020<br>(-0.06; 0.02)  | 0.70 ± 0.26 | -0.015<br>(-0.05; 0.02)  | -0.005<br>(-0.06;0.05)    | 0.875   |
| HOMA-IR (log)         | 0.08 ± 0.26  | -0.015<br>(-0.06; 0.03)  | 0.06 ± 0.29 | -0.011<br>(-0.05; 0.03)  | -0.004<br>(-0.07;0.06)    | 0.899   |
| QUICKI                | 0.37 ± 0.04  | 0.002<br>(-0.004; 0.008) | 0.38 ± 0.04 | 0.001<br>(-0.005; 0.007) | 0.001<br>(-0.008;0.01)    | 0.783   |

Abbreviations: AGB, Aged Black Garlic; Change, change from baseline. HOMA index for insulin resistance was calculated as: (insulin x glucose)/405. QUICKI index for insulin sensitivity was calculated as: 1/(log insulin + log glucose). Data expressed as mean ± standard deviation or mean (95% Confidence Interval, CI). ANCOVA Model adjusted by sex, age, and sequence of SANEs administration.

**Supplementary Table S2. Changes systemic inflammatory, oxidative, and vasodilatory biomarkers and after 6 weeks of intervention.**

| Variable                   | Intervention |                          |              |                         | Change inter-treatments   |         |
|----------------------------|--------------|--------------------------|--------------|-------------------------|---------------------------|---------|
|                            | ABG          |                          | Placebo      |                         | ABG <i>versus</i> Placebo |         |
|                            | Baseline     | Change                   | Baseline     | Change                  | Mean (95%CI)              | P-value |
| hs-CRP (log), <i>mg/dL</i> | -0.75 ± 0.41 | -0.002<br>(-0.08; 0.07)  | -0.78 ± 0.41 | 0.029<br>(-0.04; 0.10)  | -0.031<br>(-0.07; 0.14)   | 0.561   |
| IL-6 (log), <i>pg/mL</i>   | 0.20 ± 0.25  | 0.002<br>(-0.07; 0.07)   | 0.20 ± 0.26  | 0.028<br>(-0.04; 0.10)  | -0.025<br>(-0.07; 0.12)   | 0.613   |
| MCP-1                      | 1.90 ± 0.21  | -0.046<br>(-0.09;-0.003) | 1.91 ± 0.19  | -0.073<br>(-0.11;-0.03) | 0.030<br>(-0.03; 0.09)    | 0.364   |
| LDLox, <i>U/L</i>          | 121 ± 34     | -37.4<br>(-51; -24)      | 116 ± 30     | -36.2<br>(-50; -22)     | -1.21<br>(-21; 18)        | 0.902   |
| NO (log), <i>μM</i>        | 1.38 ± 0.22  | 0.037<br>(-0.03;0.11)    | 1.41 ± 0.22  | 0.023<br>(-0.05;0.09)   | 0.014<br>(-0.11;0.09)     | 0.780   |

Abbreviations: ABG, Aged Black Garlic; Change, change from baseline; hs-CRP, high-sensitivity C reactive protein; IL-6, interleukin-6; MCP-1, monocyte chemotactic protein-1; LDLox, oxidized low density lipoproteins; NO, nitric oxide. Data expressed as mean ± standard deviation or mean (95% Confidence Interval, CI). ANCOVA Model adjusted by sex, age, sequence of treatments administration.
